# Supplementary material
Source: publisher figshare collection journal article supplement (https://tandf.figshare.com/ndownloader/files/13755380)

**Supplemental material to:**

**Length and secondary structure of the 5' non-coding regions of mouse p53 mRNA transcripts - mouse as a model organism for p53 gene expression studies**

Joanna Szpotkowska, Agata Swiatkowska & Jerzy Ciesiolka\*

Institute of Bioorganic Chemistry, Polish Academy of Sciences, Poznan 61-704, Poland

## Figure legends

**Figure S1. Sequences of the transcripts identified by 5'RACE.** The sequences originated from three different samples: embryo, liver and thymus. At least twenty clones of each sample were sequenced. Start codon is underlined, first nucleotide of the mRNA-122 is denoted by red. Nucleotides preceding adenosine labelled in red are artifacts resulting from the 5'RACE procedure. The sequences for two transcripts with 247 nucleotide-long 5'UTR, which were identified in embryos, are not shown in the figure.

**Figure S2. The abundance of the p53 mRNA transcript containing 247-nucleotide-long 5'UTR.** The transcript was observed in a majority of analyzed tissues and its highest level was detected in heart, embryo, brain and spinal cord (denoted on the gel by asterisks). Three control reactions were conducted: C1- negative control reaction for cDNA synthesis, C2- negative PCR control reaction, C3- plasmid containing the sequence of mRNA-247 was used as a positive PCR control. Additional bands observed in lanes for testis and thymus samples are non-specific PCR products.  $\beta$ -actin was used as a loading control.

**Figure S3. Structural probing of the 5'-terminal region of mRNA-122.** Autoradiograms show the products of  $\text{Pb}^{2+}$ -induced cleavage (A), SHAPE (B) and chemical modification by DMS in *in vitro* conditions (C) and in the cell culture (D) identified by reverse transcription with 5'-end- $^{32}\text{P}$ -labeled DNA primers. cDNA products were analyzed on 8% polyacrylamide gels. Hairpin motifs shown in the secondary structure model of mRNA-122 (Fig. 3) are indicated in panel A, on the right side of each autoradiogram. Lanes: (-), control reaction; C, G, T and A, sequencing lines. In panel A black triangle represents increased  $\text{Pb}^{2+}$  concentrations; in panel B '+' denotes SHAPE reaction; in panel C the reaction with DMS was performed for 3, 5 and 10 min; in panel D the reaction was conducted for 10 min and it is marked as 'R'. Selected cytosine residues are labeled on the left of each autoradiogram.

**Figure S4. Probing of the structure of the 5'-terminal region of mRNA-247.**

Autoradiograms show the products of  $\text{Pb}^{2+}$ -induced cleavage (A) and SHAPE reaction (B) identified by primer extension with 5'-end- $^{32}\text{P}$ -labeled DNA primers and analyzed using 8% polyacrylamide gels. Selected hairpin motifs present in the secondary structure model of mRNA-247 (Fig. 4) are indicated in panel A, on the right of each autoradiogram. Lanes: (-): control reaction; C, G, T, A: sequencing lines. Black triangles represent increased  $\text{Pb}^{2+}$  concentrations in panel A, '+' denotes SHAPE reaction with the use of NMIA in panel B. Selected cytosine residues are labeled on the left of each radiogram.

**Figure S5. Secondary structure probing of three selected isolated hairpins from the secondary structure model of mRNA-122 and/or mRNA-247: hairpin C(-200):G(-102) (A), C(-51):G9 (B) and A89:U140 (C).** Autoradiograms show products of  $\text{Pb}^{2+}$ -induced cleavage reactions analyzed using 12% polyacrylamide gels. The experiments were conducted using 5'- $^{32}\text{P}$ -end-labelled RNAs. Lines: T1, limited hydrolysis by RNase T1 in denaturing conditions; L, formamide ladder; (-), control reaction. Black triangles above autoradiograms represent decreased  $\text{Pb}^{2+}$  concentrations and selected nucleotide residues are labeled on the left side of each autoradiogram. Nucleotides are numbered according to the model of mRNA-247.

**Figure S1**

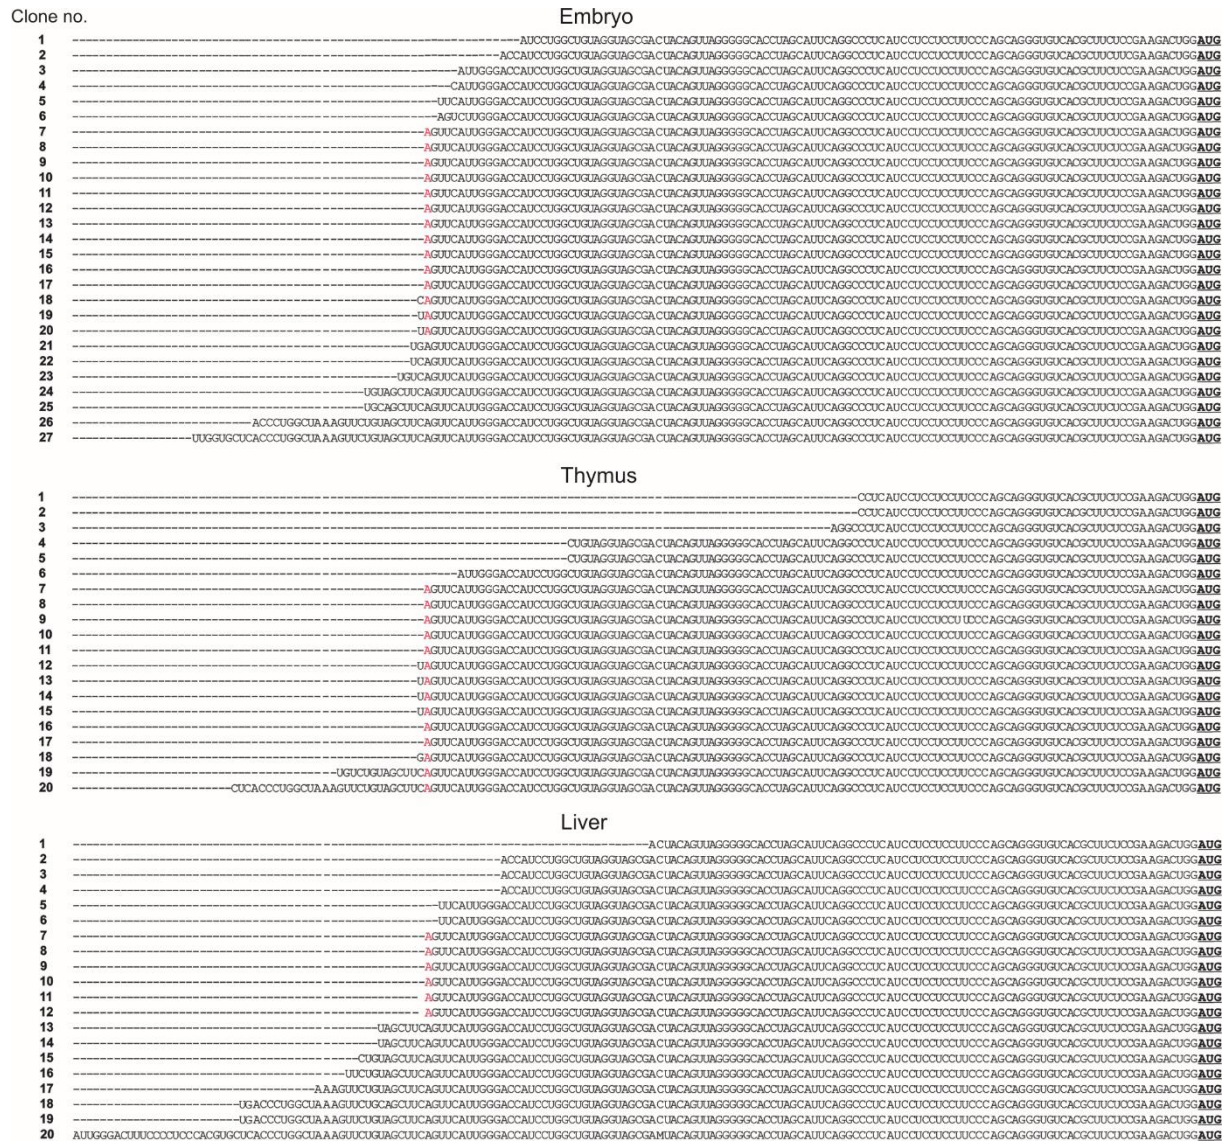

**Figure S2**

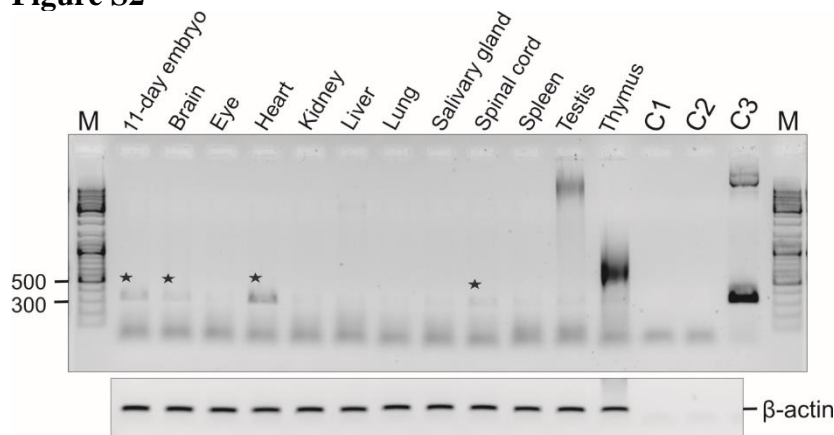

Figure S3

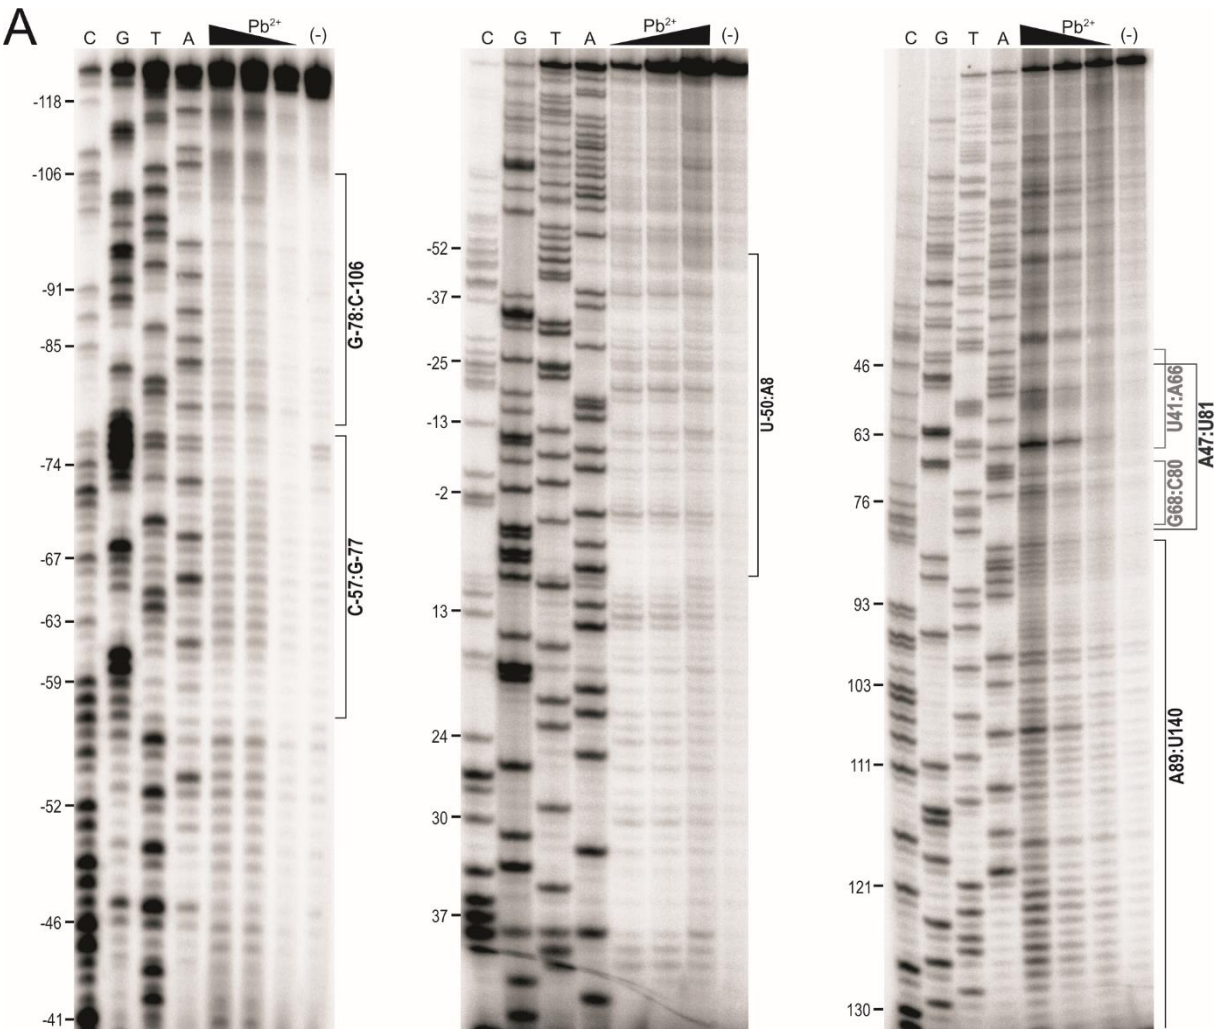

**B**

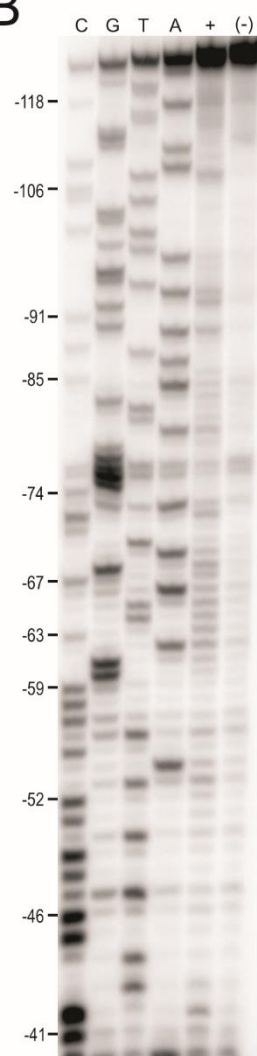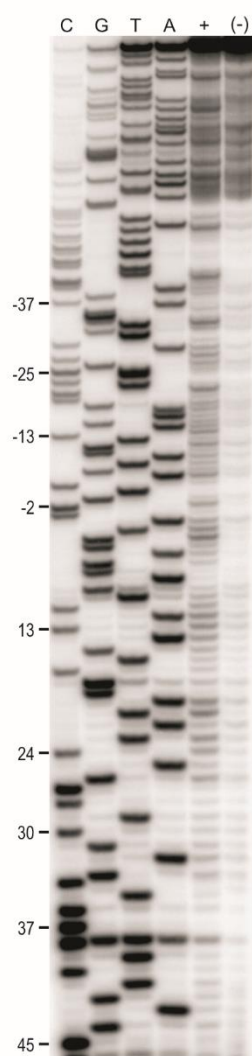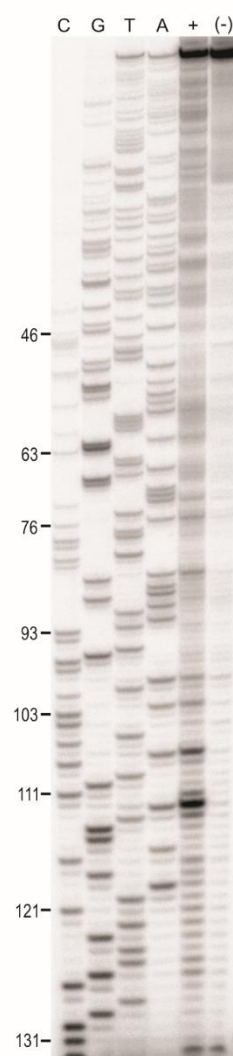



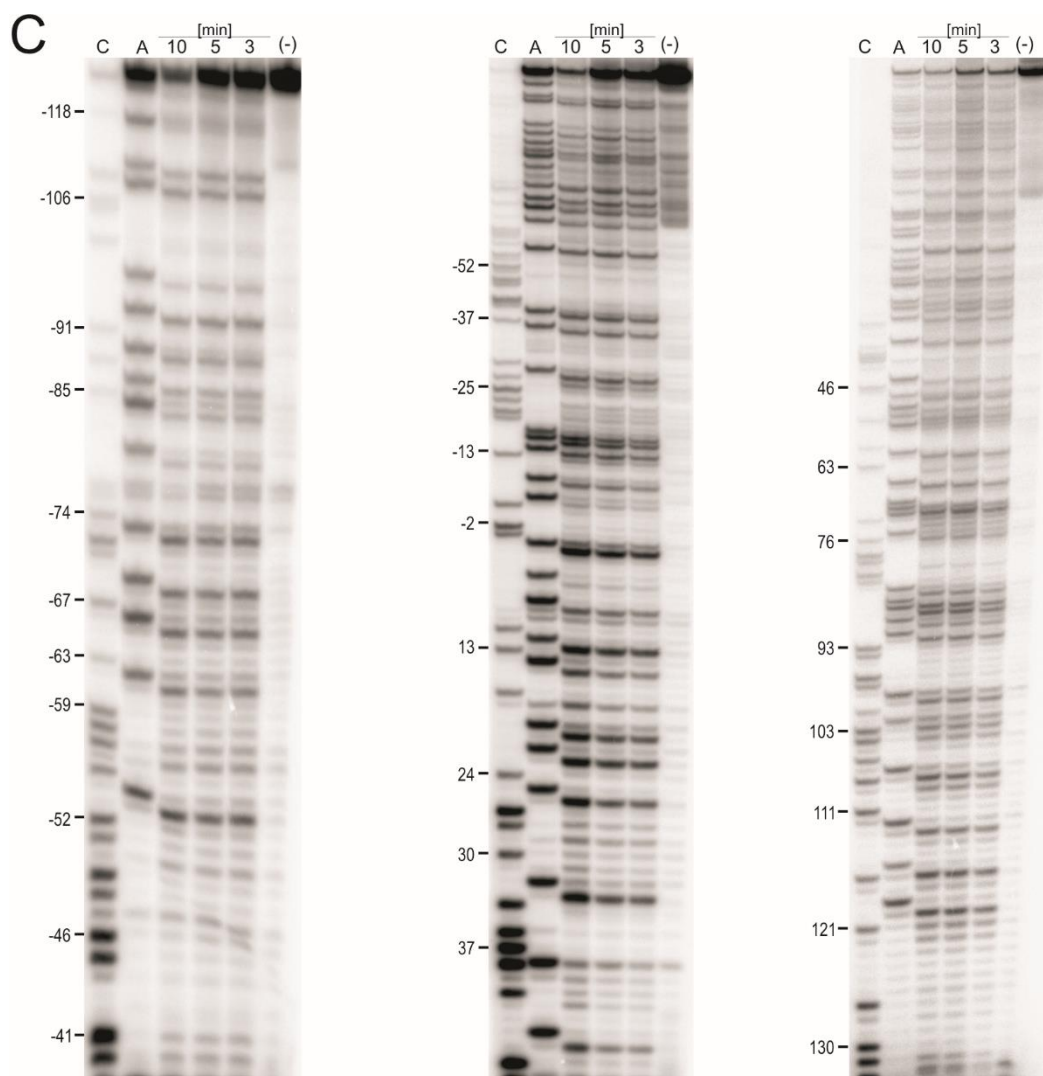

D

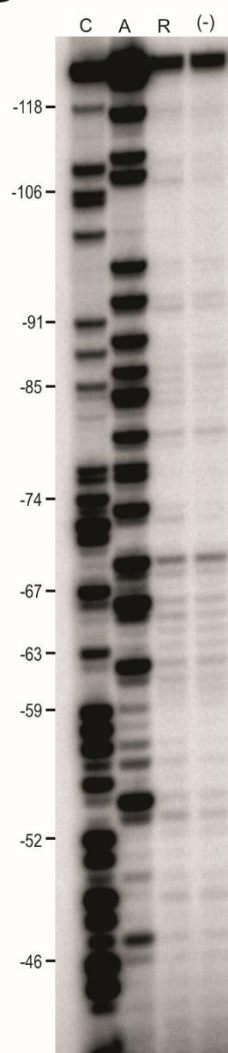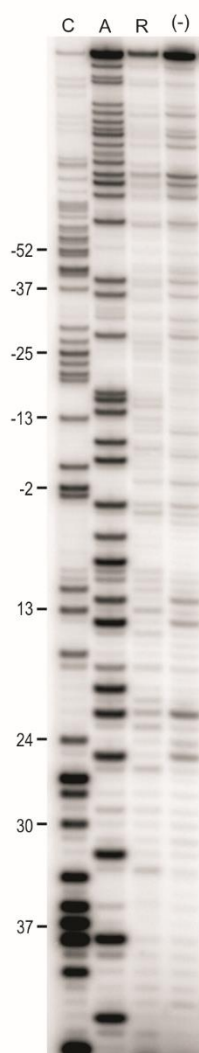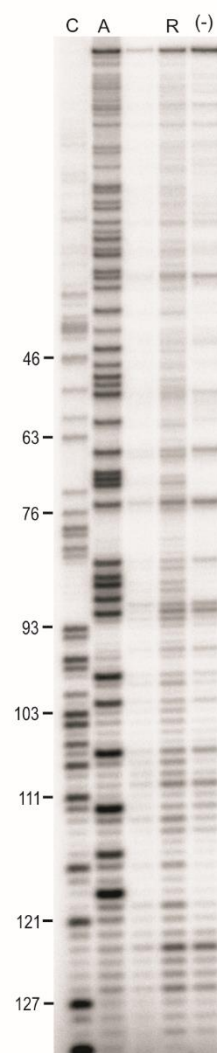

Figure S4

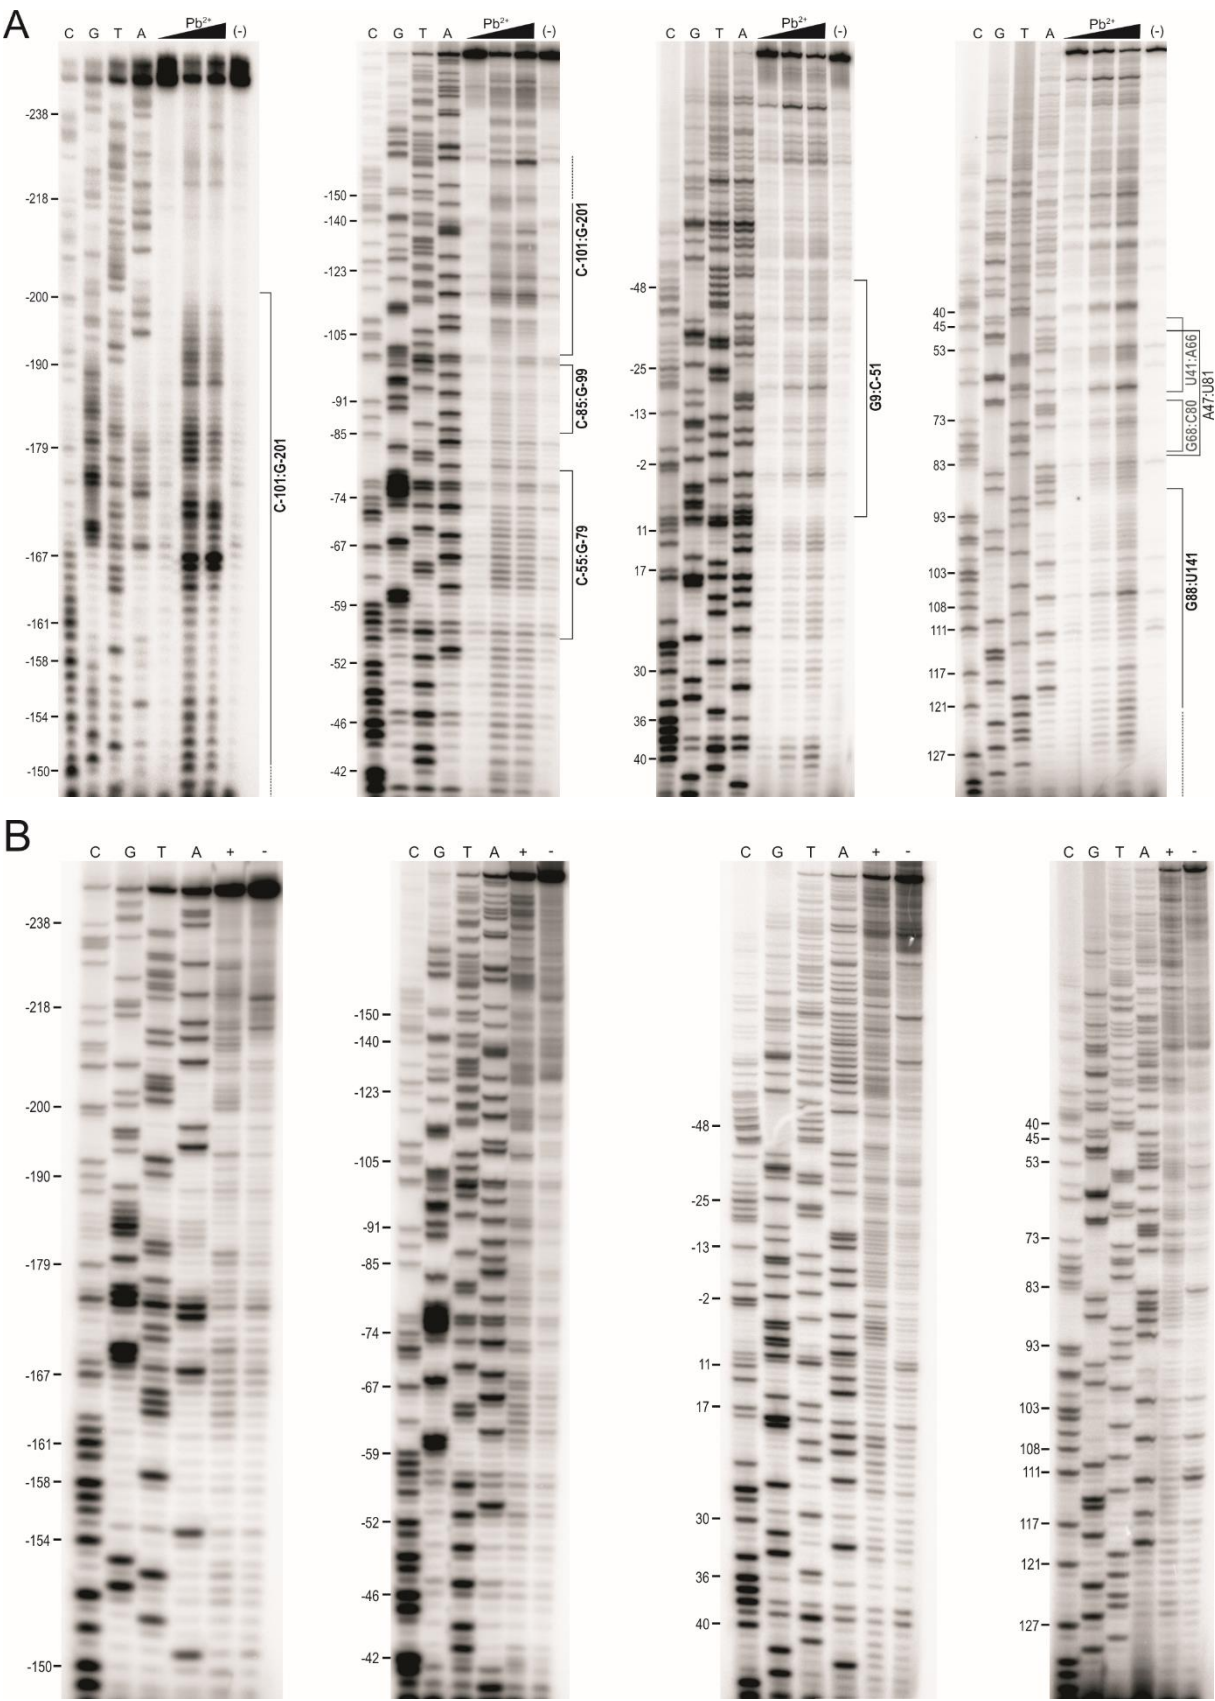



Figure S5

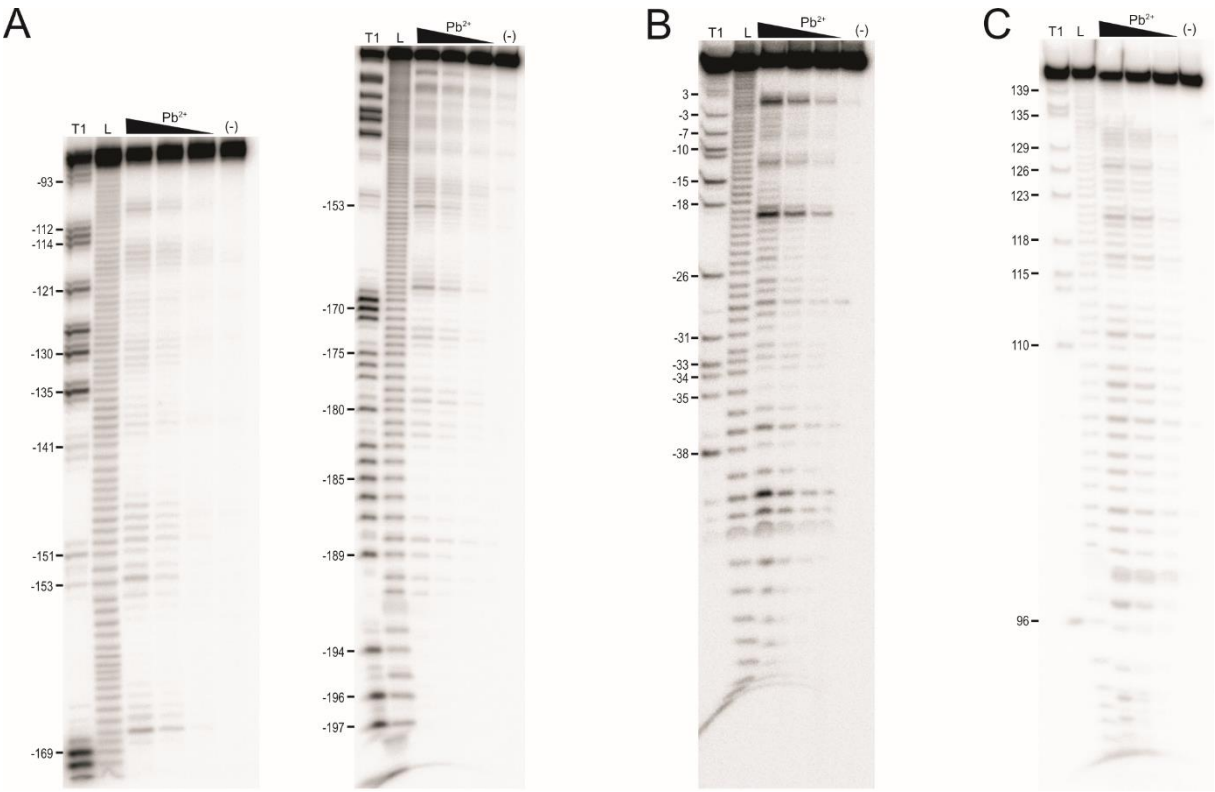

Supplement: Supplementary file 1 [file 13755380]
